# Supplementary material
Source: PubMed Central journal article supplement (PMC2975214)
Supplement: supp_M110.155150_jbc.M110.155150-1.pdf [file supp_M110.155150_jbc.M110.155150-1.pdf]

A

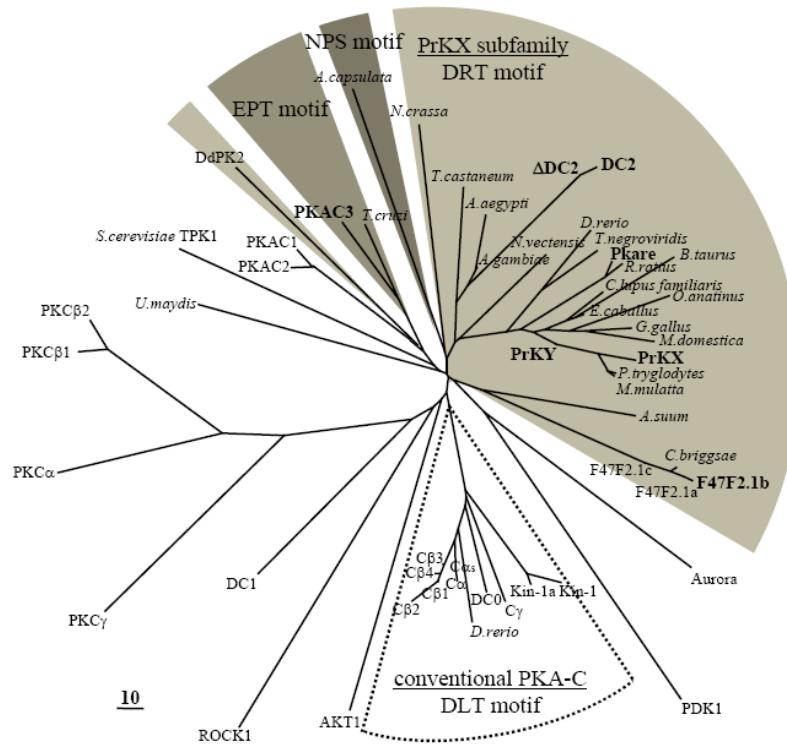

B

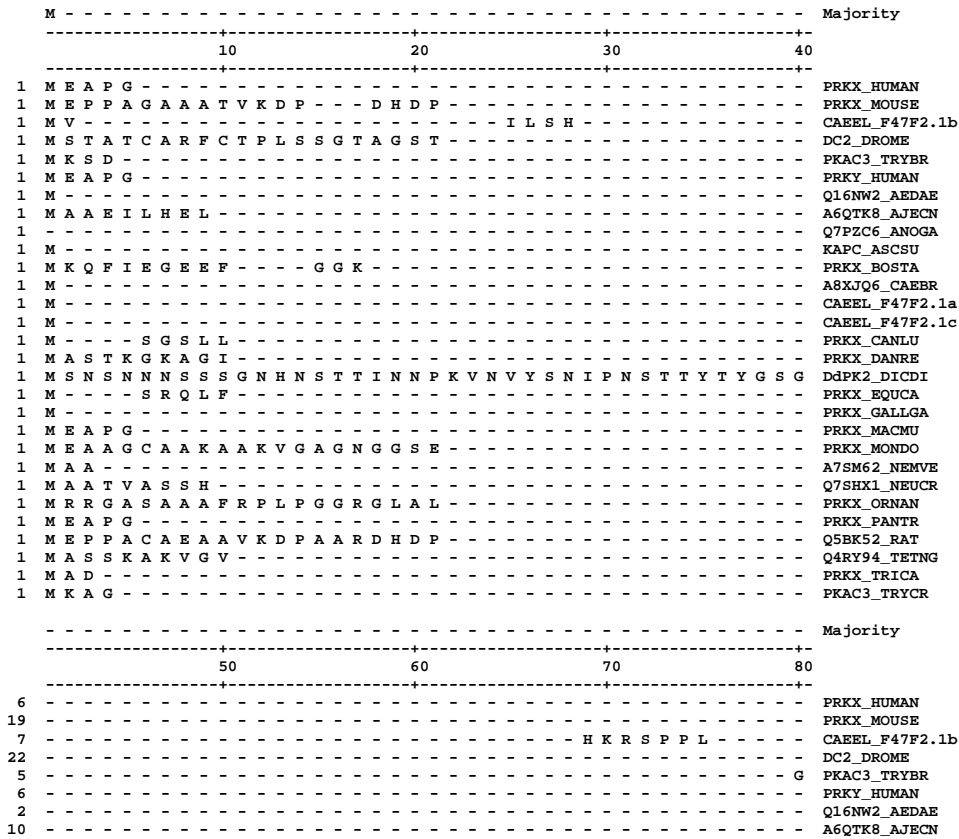

|    |                                                                                 |                |
|----|---------------------------------------------------------------------------------|----------------|
| 1  | -----                                                                           | Q7PZC6_ANOGA   |
| 2  | -----                                                                           | KAPC_ASCSU     |
| 14 | -----                                                                           | PRKX_BOSTA     |
| 2  | -----                                                                           | A8XJQ6_CAEBR   |
| 2  | -----                                                                           | CAEEL_F47F2.1a |
| 2  | -----                                                                           | CAEEL_F47F2.1c |
| 7  | -----                                                                           | PRKX_CANLU     |
| 11 | -----                                                                           | PRKX_DANRE     |
| 41 | G G G T L S G N N T N N N N T N N N N N N N N N S S G D N K N H S P V T S A T D | DgPK2_DICDI    |
| 7  | -----                                                                           | PRKX_EQUCA     |
| 2  | -----                                                                           | PRKX_GALLGA    |
| 6  | -----                                                                           | PRKX_MACMU     |
| 22 | -----                                                                           | PRKX_MONDO     |
| 4  | -----                                                                           | A7SM62_NEMVE   |
| 10 | -----                                                                           | Q7SHX1_NEUCR   |
| 22 | -----                                                                           | PRKX_ORNAN     |
| 6  | -----                                                                           | PRKX_PANTR     |
| 22 | -----                                                                           | Q5BK52_RAT     |
| 11 | -----                                                                           | Q4RY94_TETNG   |
| 4  | -----                                                                           | PRKX_TRICA     |
| 5  | -----                                                                           | PKAC3_TRYCR    |

Majority

|       |                                                                                 |       |         |       |                |
|-------|---------------------------------------------------------------------------------|-------|---------|-------|----------------|
| ----- | -----                                                                           | ----- | -----   | ----- | -----          |
| ----- | -----                                                                           | ----- | -----   | ----- | -----          |
|       | 90                                                                              | 100   | 110     | 120   |                |
| ----- | -----                                                                           | ----- | -----   | ----- | -----          |
| 6     | -----                                                                           | ----- | -----   | ----- | PRKX_HUMAN     |
| 19    | -----                                                                           | ----- | -----   | ----- | PRKX_MOUSE     |
| 14    | L M R                                                                           | ----- | L F R I | ----- | CAEEL_F47F2.1b |
| 22    | -----                                                                           | ----- | -----   | S K L | DC2_DROME      |
| 6     | C L T R K D V S S - W                                                           | ----- | -----   | ----- | PKAC3_TRYBR    |
| 6     | -----                                                                           | ----- | -----   | ----- | PRKY_HUMAN     |
| 2     | -----                                                                           | ----- | -----   | ----- | Q16NW2_AEDAE   |
| 10    | -----                                                                           | ----- | -----   | ----- | A6QTK8_AJECN   |
| 1     | -----                                                                           | ----- | -----   | ----- | Q7PZC6_ANOGA   |
| 2     | -----                                                                           | ----- | -----   | ----- | KAPC_ASCSU     |
| 14    | -----                                                                           | ----- | -----   | ----- | PRKX_BOSTA     |
| 2     | -----                                                                           | ----- | -----   | ----- | A8XJQ6_CAEBR   |
| 2     | -----                                                                           | ----- | -----   | ----- | CAEEL_F47F2.1a |
| 2     | -----                                                                           | ----- | -----   | ----- | CAEEL_F47F2.1c |
| 7     | -----                                                                           | ----- | -----   | ----- | PRKX_CANLU     |
| 11    | -----                                                                           | ----- | -----   | ----- | PRKX_DANRE     |
| 81    | R L T K M D I E E K W D N K N Y E K D E R E K S P L F H I L A S N L N S F G N F | ----- | -----   | ----- | DgPK2_DICDI    |
| 7     | -----                                                                           | ----- | -----   | ----- | PRKX_EQUCA     |
| 2     | -----                                                                           | ----- | -----   | ----- | PRKX_GALLGA    |
| 6     | -----                                                                           | ----- | -----   | ----- | PRKX_MACMU     |
| 22    | -----                                                                           | ----- | -----   | G N P | PRKX_MONDO     |
| 4     | -----                                                                           | ----- | -----   | ----- | A7SM62_NEMVE   |
| 10    | -----                                                                           | ----- | -----   | ----- | Q7SHX1_NEUCR   |
| 22    | -----                                                                           | ----- | -----   | A P P | PRKX_ORNAN     |
| 6     | -----                                                                           | ----- | -----   | ----- | PRKX_PANTR     |
| 22    | -----                                                                           | ----- | -----   | V D A | Q5BK52_RAT     |
| 11    | -----                                                                           | ----- | -----   | ----- | Q4RY94_TETNG   |
| 4     | -----                                                                           | ----- | -----   | ----- | PRKX_TRICA     |
| 6     | T V T K E E V A E - W                                                           | ----- | -----   | ----- | PKAC3_TRYCR    |

Majority

|       |                                                                               |       |                                                 |               |                |
|-------|-------------------------------------------------------------------------------|-------|-------------------------------------------------|---------------|----------------|
| ----- | -----                                                                         | ----- | -----                                           | -----         | -----          |
| ----- | -----                                                                         | ----- | -----                                           | -----         | -----          |
|       | 130                                                                           | 140   | 150                                             | 160           |                |
| ----- | -----                                                                         | ----- | -----                                           | -----         | -----          |
| 6     | L A Q A A A                                                                   | ----- | A E S D S R K V A E E T P                       | -----         | PRKX_HUMAN     |
| 22    | K V S A P                                                                     | ----- | A                                               | -----         | PRKX_MOUSE     |
| 21    | -----                                                                         | ----- | A D P K P R T S S Q K A                         | -----         | CAEEL_F47F2.1b |
| 25    | T T G N G S G N T M T S A Y K K K I P S N N S T T A N D S S N T E T T F T F K | ----- | -----                                           | -----         | DC2_DROME      |
| 16    | -----                                                                         | ----- | -----                                           | -----         | PKAC3_TRYBR    |
| 6     | P A Q A A A                                                                   | ----- | A E S N S R E V T E D A A                       | -----         | PRKY_HUMAN     |
| 2     | -----                                                                         | ----- | R H G L S I M L E T F T D R                     | -----         | Q16NW2_AEDAE   |
| 10    | -----                                                                         | ----- | Q L Q H T T P Q N A L Q N Q D I D I D V T T T E | -----         | A6QTK8_AJECN   |
| 1     | -----                                                                         | ----- | -----                                           | -----         | Q7PZC6_ANOGA   |
| 2     | -----                                                                         | ----- | -----                                           | -----         | KAPC_ASCSU     |
| 14    | P P W G S C E K A D                                                           | ----- | D D L N G W L H P A G S                         | -----         | PRKX_BOSTA     |
| 2     | -----                                                                         | ----- | S S S T S S V E S V E D E S C S                 | -----         | A8XJQ6_CAEBR   |
| 2     | -----                                                                         | ----- | S S S T S S V E S V E D E S C S                 | -----         | CAEEL_F47F2.1a |
| 2     | -----                                                                         | ----- | -----                                           | -----         | CAEEL_F47F2.1c |
| 7     | C                                                                             | ----- | -----                                           | -----         | PRKX_CANLU     |
| 11    | -----                                                                         | ----- | -----                                           | -----         | PRKX_DANRE     |
| 121   | K V P S T F S L T P P E P N K Q Q Q P Q Q Q P Q Q Q Q P Q Q Q P Q Q           | ----- | -----                                           | -----         | DgPK2_DICDI    |
| 7     | -----                                                                         | ----- | -----                                           | -----         | PRKX_EQUCA     |
| 2     | -----                                                                         | ----- | -----                                           | D A F S A A K | PRKX_GALLGA    |
| 6     | -----                                                                         | ----- | -----                                           | -----         | PRKX_MACMU     |
| 25    | P P P P P P P P P P P A P                                                     | ----- | P G S S G S G D S E P A H                       | -----         | PRKX_MONDO     |
| 4     | -----                                                                         | ----- | -----                                           | -----         | A7SM62_NEMVE   |
| 10    | -----                                                                         | ----- | P F - G G G L H P L Q A K G L                   | -----         | Q7SHX1_NEUCR   |
| 25    | P V P A P F A L H E A V A                                                     | ----- | R A E G A H V Y G E I R P C C F F A L           | -----         | PRKX_ORNAN     |
| 6     | -----                                                                         | ----- | -----                                           | -----         | PRKX_PANTR     |
| 25    | K I S A P                                                                     | ----- | A                                               | -----         | Q5BK52_RAT     |
| 11    | -----                                                                         | ----- | -----                                           | -----         | Q4RY94_TETNG   |
| 4     | -----                                                                         | ----- | -----                                           | -----         | PRKX_TRICA     |
| 16    | -----                                                                         | ----- | -----                                           | -----         | PKAC3_TRYCR    |

Majority

|       |       |       |             |       |            |
|-------|-------|-------|-------------|-------|------------|
| ----- | ----- | ----- | -----       | ----- | -----      |
| ----- | ----- | ----- | -----       | ----- | -----      |
|       | 170   | 180   | 190         | 200   |            |
| ----- | ----- | ----- | -----       | ----- | -----      |
| 25    | ----- | ----- | D G A P A L | ----- | PRKX_HUMAN |
|       | ----- | ----- | C P S P     | ----- |            |

```

40 - - - - - G H S L Q - - - - - PRKX_MOUSE
45 - - - - - N E C S A S F T F D T CAEEL_F47F2.1b
64 - - - - - L G R S N G R S S S N V A S S E S S D P L E S D Y DC2_DROME
16 - - - - - K L Q D L E I R E - - - - - PKAC3_TRYBR
25 - - - - - D W A P A L - - - - - C P S P - - - - - PRKY_HUMAN
16 - - - - - Q16NW2_AEDAE
34 K P L Q Q N N S L D H P K K R F A L E R - - - - - A6QTK8_AJECN
1 - - - - - Q7PZC6_ANOGA
13 - - - - - K A P C A S C S U - - - - - KAPC_ASCSU
39 - - - - - E P L R R T K E P A H L R L G V A S G S - - - - - PRKX_BOSTA
18 - - - - - N E C S A S F T F D T A8XJQ6_CAEBR
18 - - - - - N E C S A S F T F D T CAEEL_F47F2.1a
2 - - - - - CAEEL_F47F2.1c
8 - - - - - T - - - - - PRKX_CANLU
11 - - - - - PRKX_DANRE
161 Q Q Q Q Q P Q Q Q Q Q P Q Q Q L Q Q N N Q Q Q Q Q L Q Q Q Q L Q Q Q L Q Q Q Q DdPK2_DICDI
7 - - - - - PRKX_EQUCA
11 - - - - - M R A K S G D A A - - - - - PRKX_GALLGA
25 - - - - - D G A P A L - - - - - C P S P - - - - - PRKX_MACMU
51 - - - - - S S S P A V - - - - - G P G S - - - - - PRKX_MONDO
4 - - - - - A7SM62_NEMVE
29 Q R Q Q Q Q T Q S Q P Q - - - - - L H P - - - - - Q7SHX1_NEUCR
57 - - - - - L R L K S E G G S G H L Q A R D C P G G - - - - - PRKX_ORNAN
25 - - - - - D W A P A L - - - - - C P S P - - - - - PRKX_PANTR
43 - - - - - G H S L Q - - - - - Q5BK52_RAT
11 - - - - - Q4RY94_TETNG
24 - - - - - D Y - - - - - PRKX_TRICA
16 - - - - - Q L H D L E L G E - - - - - PKAC3_TRYCR

```

Majority

```

-----+-----+-----+-----+
                210                220                230                240
-----+-----+-----+-----+
35 - - - - - E A L - - - - - S P - - - - - E P P V Y S - - - - - PRKX_HUMAN
45 - - - - - D W - - - - - PRKX_MOUSE
56 N N N S R G N N Q - - - - - CAEEL_F47F2.1b
89 S E E D P E Q E Q Q R P - - - - - D P A T K S R S S S T A T T T T S S A DC2_DROME
25 - - - - - PKAC3_TRYBR
35 - - - - - E A R - - - - - S P - - - - - E A P A Y R - - - - - PRKY_HUMAN
16 - - - - - S - - - - - Q16NW2_AEDAE
54 - - - - - A6QTK8_AJECN
1 - - - - - Q7PZC6_ANOGA
13 - - - - - K A P C A S C S U - - - - - KAPC_ASCSU
59 - - - - - P A A - - - - - E K A G - L C S V - - - - - G T A S F K S - - - - - PRKX_BOSTA
29 N N N S R G D Q Q - - - - - A8XJQ6_CAEBR
29 N N N S R G N N Q - - - - - CAEEL_F47F2.1a
2 - - - - - CAEEL_F47F2.1c
9 - - - - - P P S - - - - - G N I N - V C M G - - - - - T - - - - - PRKX_CANLU
11 - - - - - PRKX_DANRE
201 Q Q Q Q Q Q Q Q Q Q Q Q Q Q Q Q Q Q Q Q Q H L H Q D G I V N T P S T T Q T S DdPK2_DICDI
7 - - - - - PRKX_EQUCA
21 - - - - - PRKX_GALLGA
35 - - - - - E A R - - - - - S P - - - - - E P P A Y R - - - - - PRKX_MACMU
61 - - - - - P A P - - - - - S P - - - - - E L P A Y K - - - - - PRKX_MONDO
4 - - - - - A7SM62_NEMVE
45 - - - - - Q7SHX1_NEUCR
77 - - - - - Q W G - - - - - H P V D W A C L R F F K Q A A G T R Q C PRKX_ORNAN
35 - - - - - E A R - - - - - S P - - - - - E A P A Y R - - - - - PRKX_PANTR
48 - - - - - D W - - - - - Q5BK52_RAT
11 - - - - - S E D D K E G - - - - - Q4RY94_TETNG
26 - - - - - PRKX_TRICA
25 - - - - - PKAC3_TRYCR

```

Majority

```

-----+-----+-----+-----+
                250                260                270                280
-----+-----+-----+-----+
46 - - L Q D F D T L A - - - - - PRKX_HUMAN
47 - - - - - PRKX_MOUSE
65 - - - - - V N E L A E E T H M K L S I T P T R E S F - - - - - CAEEL_F47F2.1b
121 D H D N D V D E E D E D D E - - - - - D E G E G N - - - - - DC2_DROME
25 - - - - - PKAC3_TRYBR
46 - - L Q D C D A L V - - - - - PRKY_HUMAN
17 - - - - - Q16NW2_AEDAE
54 - - - - - C N P G P P A S - - - - - A6QTK8_AJECN
1 - - - - - Q7PZC6_ANOGA
13 - - - - - V S I T I D P N N N K L - - - - - KAPC_ASCSU
77 - - - - - K S K T A R - - - - - D D C F R R - - - - - PRKX_BOSTA
38 - - - - - V D E L A E E T H M K L S I T P T R E S F - - - - - A8XJQ6_CAEBR
38 - - - - - V N E L A E E T H M K L S I T P T R E S F - - - - - CAEEL_F47F2.1a
2 - - - - - K L S I T P T R E S F - - - - - CAEEL_F47F2.1c
21 - - - - - F K L V P - - - - - F T L F T S - - - - - PRKX_CANLU
11 - - - - - N N E S S G R D S G - - - - - R T E A G S - - - - - PRKX_DANRE
241 T T T T T T T T T N P H T S G L S L Q H A H S S Y T P S N V L H S P T H F Q S DdPK2_DICDI
9 - - - - - R R - - - - - S Y F S S - - - - - PRKX_EQUCA
21 - - - - - A A A G L A A P Q P A - - - - - A T A P S P - - - - - PRKX_GALLGA
46 - - L Q D F D T L A - - - - - PRKX_MACMU
72 - - L Q D F D T L A - - - - - PRKX_MONDO
4 - - - - - A7SM62_NEMVE
45 - - - - - C M L S Q H H S Y - - - - - Q7SHX1_NEUCR
100 A L L Q G E D G Q A G R E E G - - - - - R P T L G S - - - - - PRKX_ORNAN
46 - - L Q D F D A L V - - - - - PRKX_PANTR
50 - - - - - Q5BK52_RAT
11 - - - - - N M E T N A V K E N K - - - - - S S A G S S - - - - - Q4RY94_TETNG
33 - - - - - PRKX_TRICA

```

```

25 - - - - - PKAC3_TRYCR
-----
Majority
-----
290 300 310 320
-----
54 - - - - - PRKX_HUMAN
47 - - - - - PRKX_MOUSE
86 - - - - - CAEEL_F47F2.1b
142 GRDADDDATHDSSSESI EEDDGN ETDD EDDDESEESS SVQT DC2_DROME
25 - - - - - PKAC3_TRYBR
54 - - - - - PRKY_HUMAN
17 - - - - - Q16NW2_AEDAE
62 - - - - - A6QTK8_AJECN
1 - - - - - Q7PZC6_ANOGA
25 - - - - - KAPC_ASCSU
89 PLGSPSGTWD AVH - - - - - PRKX_BOSTA
59 - - - - - A8XJQ6_CAEBR
59 - - - - - CAEEL_F47F2.1a
13 - - - - - CAEEL_F47F2.1c
32 CAVSPTP - - - - - PRKX_CANLU
28 PTL PAGAASLT TN - - - - - PRKX_DANRE
281 SLPTRLDNTNPI TTP I RQQQQSQQQLQQQI PPP TVNS DgPK2_DICDI
16 PAPETES - - - - - PRKX_EQUCA
38 AGPGSPSAPEPTA - - - - - PRKX_GALLGA
54 - - - - - PRKX_MACMU
80 - - - - - PRKX_MONDO
4 - - - - - VST A7SMG2_NEMVE
54 - - - - - QNDQRRNDPSQTQKNN D TSGGFEM Q7SHX1_NEUCR
121 SPPKSSGGSGDCG - - - - - PRKX_ORNAN
54 - - - - - PRKX_PANTR
50 - - - - - Q5BK52_RAT
28 AGETS P SANL - - - - - Q4RY94_TETNG
33 - - - - - PRKX_TRICA
25 - - - - - PKAC3_TRYCR

- - - - - L - - - - ERI - TIGTGT FGRVHLVKDKKTA K - Majority
-----
330 340 350 360
-----
54 - - - - - T - - - - - VGTGT FGRVHLVKEKTA K - PRKX_HUMAN
47 - - - - - - - - - - DTIATVGTGT FGRVNLVKEK TGR - PRKX_MOUSE
86 - - - - - - SLSQLERIITIGKGT FGRV ELARDKITG - CAEEL_F47F2.1b
182 - - - - - AKGVRKYHLDDYQI IKT VGTGT FGRVCLCRDRISE - DC2_DROME
25 - - - - - - - - - - TIGTGT FGRVRLCRHRASG - PKAC3_TRYBR
54 - - - - - - - - - - MGTGT FGRVHLVKEKTA K - PRKY_HUMAN
17 - - - - - - FVFLAFLIT - - - - - GTGT FGRVCLCRDKETD - Q16NW2_AEDAE
81 - - - - - - SSEL SIGDFEL LQT LGTGT FARV L VRL LKHTG - A6QTK8_AJECN
1 - - - - - - - - - - TI - - - - - GTGT FGRVCLCRDKITN - Q7PZC6_ANOGA
25 - - - - - - NVDDDFRICTIGTGSFGRVYLVQHRASE - KAPC_ASCSU
102 - - - - - GWV CGRVDLALDDL LGTGT FGRVQLVQEKTSK - PRKX_BOSTA
59 - - - - - - SLSQLERIVTIGKGT FGRV ELARDKISG - A8XJQ6_CAEBR
59 - - - - - - SLSQLERIITIGKGT FGRV ELARDKITG - CAEEL_F47F2.1a
13 - - - - - - SLSQLERIITIGKGT FGRV ELARDKITG - CAEEL_F47F2.1c
39 - - - - - - - - - - GTGT FGRVQLVKDKKAAK - PRKX_CANLU
41 - - - - - - RTYTLDDLDTIATVGTGT FGRVFLVKDKKTR - PRKX_DANRE
321 FFLPPP VNARERLKEFKQIRVIGTGT FGKVVLIQNTKDG - DgPK2_DICDI
23 - - - - - - - - - - LRTGT FGRVQLVKEKKA K - PRKX_EQUCA
51 - - - - - - Y - - - - - KLEDELETLATVGTGT FGRVHLVKEKMGK - PRKX_GALLGA
54 - - - - - - - - - - VGTGT FGRVHLVKEKTA K - PRKX_MACMU
80 - - - - - - - - - - TQLDQVERIKF IGTGT FGRVHLVKEKTA K - PRKX_MONDO
7 - - - - - - RKKDKRTTLQDFELSKTLGTGT FGRV L LARDR RG - A7SMG2_NEMVE
78 - - - - - - ATRKPRLSDFHR - - - - - T FARV L V R PANGTE - Q7SHX1_NEUCR
134 - - - - - - FWTRDEEVEERRRLLSTGT FGRVHLVKEKTA K - PRKX_ORNAN
54 - - - - - - - - - - VGTGT FGRVHLVKEKTA K - PRKX_PANTR
50 - - - - - - - - - - DTIATVGTGT FGRVNLVKEK TGR - Q5BK52_RAT
38 - - - - - - RMYSLDELD TIATV - - - - - VKDKKTR - Q4RY94_TETNG
33 - - - - - - YDIDDFNI IKTIGTGT FGRV L LCKNKSTN - PRKX_TRICA
25 - - - - - - - - - - TIGTGT FGRVRLCKHKTS G - PKAC3_TRYCR

- - - - - HYFALKVMSIPDVIRL KQE QHVHNEKSVLKEVS - HP Majority
-----
370 380 390 400
-----
73 - - - - - HFFALKVMSIPDVIRL KQE QHVHNEKSVLKEVS - HP PRKX_HUMAN
70 - - - - - KYCALKIMSIPDVIRL KQE QHVQNEKAVLKEIN - HP PRKX_MOUSE
114 - - - - - AHYALKV LNI RRVVDMRQTQH V HNEKRVLLQLK - HP CAEEL_F47F2.1b
217 - - - - - KYCAMKILAMTEVIRL KQIEHVKNERNILREIR - HP DC2_DROME
44 - - - - - QYVVLKILK KQEILRMKQV DHI LAESSILQELS - HP PKAC3_TRYBR
73 - - - - - HFFALKVMSIPDVIRR KQE QHVHNEKSVLKEVS - HP PRKY_HUMAN
43 - - - - - KYWAMKILAMADVIRL KQIEHVKN EKNILREID - HP Q16NW2_AEDAE
115 KFKNGAYALKV LHKADVIRL KQVEHV RNEIETLNAVAGHP - HP A6QTK8_AJECN
20 - - - - - KYWAMKILAMADVIRL KQIEHVKN EKNILQEI D - HP Q7PZC6_ANOGA
53 - - - - - QYFALKKMAIREV VSMRQT EHVHSEKRLLSRLS - HP KAPC_ASCSU
133 - - - - - HFFALKVMTIPD IIRL KQE QHVHNEKSVLKEVN - HP PRKX_BOSTA
87 - - - - - AHYALKV LNI RRVVDMRQTQH V HNEKRVLLQLK - HP A8XJQ6_CAEBR
87 - - - - - AHYALKV LNI RRVVDMRQTQH V HNEKRVLLQLK - HP CAEEL_F47F2.1a
41 - - - - - AHYALKV LNI RRVVDMRQTQH V HNEKRVLLQLK - HP CAEEL_F47F2.1c
56 - - - - - HFFALKVMSIPDVIRL KQE QHVHNEKSVLKEVS - HP PRKX_CANLU
72 - - - - - GFFALKAMKIPDVIRL KQIEHVHNEKVELTEVN - HP PRKX_DANRE
360 - - - - - CYFAMKCLNKAYV VRLKQVEHLNS EKSILSSI H - HP DgPK2_DICDI
41 - - - - - HFFALKVMSIPDVIRL KQE QHVHNEKSVLKEVS - HP PRKX_EQUCA
80 - - - - - HYFALKVMSIPDVIRL KQE QHVHNEKSVLKEVN - HP PRKX_GALLGA
73 - - - - - HFFALKVMSIPDVIRL KQE QHVHNEKSVLKEVS - HP PRKX_MACMU
109 - - - - - HYFALKVMSIPDVIRL KQE QHVHNEKSVLKEVS - HP PRKX_MONDO

```

```

42 - - - - E F Y A L K I M N I S E V I R L K Q V E H V Q N E K N I L M S I E - H P A7SM62_NEMVE
105 I D R Q K V Y A L K I L R K T E V I R L K Q I D H V R H E R Q I L Q D V T G H P Q7SHX1_NEUCR
165 - - - - H Y F A L K V M S I P D V I R L K Q E Q H V H N E K S V L K E V N - H P PRKX_ORNAN
73 - - - - H F F A L K V M S I P D V I R L K Q E Q H V H N E K S V L K E V S - H P PRKX_PANTR
73 - - - - R Y C A L K I M S I P D V I R L K Q E Q H V Q N E K A V L K E I N - H P Q5BK52_RAT
59 - - - - T F Y A L K Q M K I P D V I R L K Q E Q H V H N E K E V L T E V T - H P Q4RY94_TETNG
62 - - - - Q Y S A M K I L C L S D V I R L K Q V E H V K N E K N I L Q E I R - H P PRKX_TRICA
44 - - - - K Y M A L K I L K K Q E V L R M K Q V E H I L A E S S I L Q E L N - H P PKAC3_TRYCR

```

```

F L V K L F W T F H D E R F L Y M L M E Y V P G G E L F S Y L R N R G R F S S N S Majority
-----+-----+-----+-----+-----+
                410                420                430                440
-----+-----+-----+-----+-----+

```

```

108 F L I R L F W T W H D E R F L Y M L M E Y V P G G E L F S Y L R N R G R F S S T PRKX_HUMAN
105 F L I K L L W T G H D N R F L Y M L M E F V P G G E L F T Y L R N R G R F S S V PRKX_MOUSE
149 F I V K M Y A S E K D S N H L Y M I M E F V P G G E M F S Y L R A S R S F S N S CAEEL_F47F2.1b
252 F V I S L E W S T K D D S N L Y M I F D Y V C G G E L F T Y L R N A G K F T S Q DC2_DROME
79 F I V T M Y K G F M D D R L Y L L L E Y V V G G E L F S H L R K A G K F P N D PKAC3_TRYBR
108 F L I R L F W T W H E E R F L Y M L M E Y V P G G E L F S Y L R N R G H F S S T PRKY_HUMAN
78 F V V N M R W H A K D D C C L Y M L F E Y V S G G E L F S Y L R N A G R F D N A Q16NW2_AEDAE
155 F I T T L V A T F T D D L S L Y M L L E Y C P G G E I F T F L R R A R R F D V S A6QTK8_AJECN
55 F I V N M R W N S K D D C C L Y M L F E F V S G G E L F S Y L R N A G R F D S A Q7PZC6_ANOGA
88 F I V K M Y C A S W D K Y N L Y M L F E Y L A G G E L F S Y L R A S R T F S N S KAPC_ASCSU
168 F L V K L F W T G H D D R F L Y M L M E F V P G G E L F S Y L R N R G R F S S N PRKX_BOSTA
122 F I V K M Y A S E K D S N N L Y M I M E F V P G G E M F S Y L R A S R S F S N S A8XJQ6_CAEBR
122 F I V K M Y A S E K D S N H L Y M I M E F V P G G E M F S Y L R A S R S F S N S CAEEL_F47F2.1a
76 F I V K M Y A S E K D S N H L Y M I M E F V P G G E M F S Y L R A S R S F S N S CAEEL_F47F2.1c
91 F L V K L F W T C H D E R F L Y M L M E F V P G G E L F S Y L R N R G R F S S S PRKX_CANLU
107 F L V R L F W T H H D D R F L Y M L M E Y V N G G E L F S Y L R S R G H F S S S PRKX_DANRE
395 F I V N L Y Q A F Q D E K K L Y L L F E Y V A G G E V F T H L R K S M K F S N S DgPK2_DICDI
76 F L V K L F W T Y H D E R F L Y M L M E F V P G G E L F S Y L R N R G R F A S N PRKX_EQUCA
115 F L I R L F W T Y H D E R F L Y M L M E Y V P G G E L F S Y L R N M G R F N N S PRKX_GALLGA
108 F L I R L F W T W H D E R F L Y M L M E Y V P G G E L F S Y L R N R G R F S S T PRKX_MACMU
144 F L I R L Y W T Y H D E R F L Y M L M E Y D P G E Y L F S Y V R D M G R F N N S PRKX_MONDO
77 F I V N L L W T Q H D Q T F L Y M L L E Y A C G G E L F T Y L R T A G R F N N G A7SM62_NEMVE
145 F I T S L Q A S F S D H D F L Y L L L D Y I P G G E L F T Y L R K Y R R F D E E Q7SHX1_NEUCR
200 F L I R L Y W T Y H D E R F L Y M L M E Y V P G G E L F S Y L R N M G R F N N S PRKX_ORNAN
108 F L I R L F W T W H D E H F L Y M L M E Y V P G G E L F S Y L R N Q G C F S S T PRKX_PANTR
108 F L I K L L W T D H D N R F L Y M L M E F V P G G E L F T Y L R N R G R F S S V Q5BK52_RAT
94 F I R L F W T H H D Q R F L Y M L M D F V P G G E L F S Y L R S R G R F S N T Q4RY94_TETNG
97 F I V N M L W C S K D N T C I Y M L F E Y V C G G E L F S Y L R N A G R F S T S PRKX_TRICA
79 F I V N M L K G F M D N D R L Y I L L E Y V V G G E L F T H L R K A G K F P N D PKAC3_TRYCR

```

```

T G L F Y A A E I V C A I E Y L H S K E - - I V Y R D L K P E N I L L D R E G H Majority
-----+-----+-----+-----+
                450                460                470                480
-----+-----+-----+-----+

```

```

148 T G L F Y S A E I I C A I E Y L H S K E - - I V Y R D L K P E N I L L D R D G H PRKX_HUMAN
145 A S V F Y A T E I V C A I E Y L H S K E - - I V Y R D L K P E N I L L D R E G H PRKX_MOUSE
189 M A R F Y A S E I V C A I E Y I H S L G - - I V Y R D L K P E N L M L S K E G H CAEEL_F47F2.1b
292 T S N F Y A A E I V S A L E Y L H S L Q - - I V Y R D L K P E N L L I N R D G H DC2_DROME
119 V A K F Y S A E I V L A F E Y I H E C G - - I V Y R D L K P E N V L L D K Q G N PKAC3_TRYBR
148 T G L F Y S A E I I C A I E Y L H S K E - - I V Y R D L K P E N I L L D R D G H PRKY_HUMAN
118 T A N F Y A C E I V L A L E F L H S H A L S - - I V Y R D L K P E N L L L D R D G H Q16NW2_AEDAE
195 T A Q F Y A A E I V L I L E F L H D V H G - I A Y R D L K P E N I L L D A D G H A6QTK8_AJECN
95 T A N F Y A C E I V L A L E Y L H S L S - - I V Y R D L K P E N L L L D R E G H Q7PZC6_ANOGA
128 M A R F Y A A E I V C A I Q Y L H S K N - - I A Y R D L K P E N L M L N K E G H KAPC_ASCSU
208 T G L F Y A A E I V C A I E Y L H S R D - - I V Y R D L K P E N I L L D R D G H PRKX_BOSTA
162 M A R F Y A S E I V C A I E Y I H S L G - - I V Y R D L K P E N L M L S K E G H A8XJQ6_CAEBR
162 M A R F Y A S E I V C A I E Y I H S L G - - I V Y R D L K P E N L M L S K E G H CAEEL_F47F2.1a
116 M A R F Y A S E I V C A I E Y I H S L G - - I V Y R D L K P E N L M L S K E G H CAEEL_F47F2.1c
131 T G L F Y S A E I I C A I E Y L H S K E - - I V Y R D L K P E N I L L D R E G H PRKX_CANLU
147 T G M F Y S A E I V C A I E Y L H S K E - - I V Y R D L K P E N I L L D S E G H PRKX_DANRE
145 T A K F Y A A E I V L A L E F L H K Q N - - I V Y R D L K P E N L L I D N Q G H DgPK2_DICDI
116 T G L F Y S A E I V C A I E Y L H S K E - - I V Y R D L K P E N I L L D R D G H PRKX_EQUCA
155 T G L F Y S T E I I C A I E Y L H S K E - - I V Y R D L K P E N I L L D K E G H PRKX_GALLGA
148 T G L F Y S A E I I C A I E Y L H S K E - - I V Y R D L K P E N I L L D R D G H PRKX_MACMU
184 T G L F Y S A E I I C A I E Y L H S K E - - I V Y R D L K P E N I L L D K E G H PRKX_MONDO
117 T G L F F G S E I V S A M D Y L H G H S - - I V Y R D L K P E N I L L D R D G H A7SM62_NEMVE
185 M A R F Y A A E I V L V L E Y L H E E Q G G I A Y R D M K P E N L L L D A D G H Q7SHX1_NEUCR
240 T G L F Y S T E I I C A I E Y I H S K E - - I V Y R D L K P E N I L L D K E G H PRKX_ORNAN
148 T G L F Y S A E I I C A M E Y L H S K E - - I V Y R D L E P E N I L L D R D G H PRKX_PANTR
148 A A I F Y A T E I V C A I E Y L H S K E - - I V Y R D L K P E N I L L D R E G H Q5BK52_RAT
134 T G L F Y T S E I V C A I E Y L H S K E - - I V Y R D L K P E N I L L D S E G H Q4RY94_TETNG
137 T G N F Y T S E I V S A L E Y L H S R S - - I V Y R D L K P E N L L L D K D G H PRKX_TRICA
119 V A K F Y S A E I V L A F E Y L H S N S - - I V Y R D L K P E N L L L D A Q G N PKAC3_TRYCR

```

```

I K L T D F G F A K K L - - - - V D R - - - T W T L C G T P E Y L A P E V I Q S Majority
-----+-----+-----+-----+
                490                500                510                520
-----+-----+-----+-----+

```

```

186 I K L T D F G F A K K L - - - - V D R - - - T W T L C G T P E Y L A P E V I Q S PRKX_HUMAN
183 I K L T D F G F A K K L - - - - V D R - - - T W T L C G T P E Y L A P E V I Q S PRKX_MOUSE
227 I K M A D F G F A K K L - - - - R D R - - - T Y T I C G T P D Y L A P E S L A R CAEEL_F47F2.1b
330 L K I T D F G F A K K L - - - - R D R - - - T W T L C G T P E Y I A P E I I Q S DC2_DROME
157 I K I T D F G F A K R V - - - - R D R - - - T Y T L C G T P E Y L A P E I I Q S PKAC3_TRYBR
186 I K L T D F G F A K K L - - - - V D R - - - T W T L C G T P E Y L A P E V I Q S PRKY_HUMAN
156 L K I T D F G F A K K L - - - - K D R - - - T W T L C G T P E Y L A P E I I Q S Q16NW2_AEDAE
234 L K L V D F G F A K K L - - - - W S R E T Y T L C G T P E Y L A P E V I H N A6QTK8_AJECN
133 M K I T D F G F A K K L - - - - K D R - - - T W T L C G T P E Y L A P E I I Q S Q7PZC6_ANOGA
166 L K M T D F G F A K K E V - - - - I D R - - - T W T M C G T P E Y L A P E V I G N KAPC_ASCSU
246 V K L T D F G F A K K L - - - - V D K - - - T W T L C G T P E Y L A P E V I Q S PRKX_BOSTA
200 I K M A D F G F A K K L - - - - R D R - - - T Y T I C G T P D Y L A P E S L A R A8XJQ6_CAEBR
200 I K M A D F G F A K K E L - - - - R D R - - - T Y T I C G T P D Y L A P E S L A R CAEEL_F47F2.1a
154 I K M A D F G F A K K E L - - - - R D R - - - T Y T I C G T P D Y L A P E S L A R CAEEL_F47F2.1c

```

169 I K L T D F G F A K K L - - - - V D K - - - T W T L C G T P E Y L A P E V I Q S PRKX\_CANLU
185 I R L T D F G F A K K L - - - - S E R - - - T W T L C G T P E Y L A P E V I Q S PRKX\_DANRE
473 I K I T D F G F A K R V - - - - E D R - - - T F T L C G T P E Y L A P E I I Q S DdPK2\_DICDI
154 I K L T D F G F A K K L - - - - V D K - - - T W T L C G T P E Y L A P E V I Q S PRKX\_EQUCA
193 I K L T D F G F A K K L - - - - V D R - - - T W T L C G T P E Y L A P E V I Q S PRKX\_GALLGA
186 I K L T D F G F A K K L - - - - V D R - - - T W T L C G T P E Y L A P E V I Q S PRKX\_MACMU
222 I K L T D F G F A K K L - - - - L D R - - - T W T L C G T P E Y L A P E V I Q S PRKX\_MONDO
155 V K L T D F G F A K E V - - - - H D K - - - T W T L C G T P E Y L A P E I I Q S A7SM62\_NEMVE
225 I K L V D F G F A K R L G Y N D V E R P V E T Y T L C G T P E Y L A P E V I Q N Q7SHX1\_NEUCR
278 I K L T D F G F A K K L - - - - V D K - - - T W T L C G T P E Y L A P E V I Q S PRKX\_ORNAN
186 I K L T D F G F A K K L - - - - V D R - - - T W T L C G T P E Y L A P E V I Q S PRKX\_PANTR
186 I K L T D F G F A K K L - - - - V D R - - - T W T L C G T P E Y L A P E V I Q S Q5BK52\_RAT
172 I R L T D F G F A K K L - - - - S D R - - - T W T L C G T P E Y L A P E V I Q S Q4RY94\_TETNG
175 L K I T D F G F A K K L - - - - T D R - - - T W T L C G T P E Y L A P E I I Q S PRKX\_TRICA
157 I K I T D F G F A K R V - - - - T E R - - - T F T L C G T P E Y L A P E V I Q S PKAC3\_TRYCR

K G H G R A V D W W A L G I L I F E M L S G F P P F F D D N P F G I Y Q K I L A Majority
-----+-----+-----+-----+
530 540 550 560

219 K G H G R A V D W W A L G I L I F E M L S G F P P F F D D N P F G I Y Q K I L A PRKX\_HUMAN
216 K G H G R A V D W W A L G I L I F E M L S G F P P F F D D N P F G I Y Q K I L A PRKX\_MOUSE
260 T G H N K G V D W W A L G I L I Y E M M V G K P P F R G K T T S E I Y D A I I E CAEEL\_F47F2.1b
363 K G H N K A V D W W A L G V L I Y E M L V G Y P P F Y D E Q P F G I Y E K I L S DC2\_DROME
190 K G H D R A V D W W T L G I L L Y E M L V G Y P P F F D E S P F R T Y E K I L E PKAC3\_TRYBR
219 K G H G R A V D W W A L G I L I F E M L S G F P P F F D D N P F G I Y Q K I L A PRKY\_HUMAN
189 K G H N K A V D W W A L G V L I Y E M M V G Y P P F Y D D N P F G I Y E K I L S Q16NW2\_AEDAE
268 S G H G L A V D W W A L G V L I Y E F I V G Q P P F W D P N P M R I Y K Q I V D A6QTK8\_AJECN
166 K G H N K A V D W W A L G V L I Y E M I V G Y P P F Y D D N P F G I Y E K I L S Q7PZC6\_ANOGA
199 K G H D T A V D W W S L G V L I Y E M M I G I P P F R G K T L D E I Y E K I I L KAPC\_ASCSU
279 K G H G R A V D W W A L G I L I F E M L S G F P P F F D D N A F G I Y Q K I L A PRKX\_BOSTA
233 T G H N K G V D W W A L G I L I Y E M M V G K P P F R G K T T A E I Y D S I I E A8XJQ6\_CAEBR
233 T G H N K G V D W W A L G I L I Y E M M V G K P P F R G K T T S E I Y D A I I E CAEEL\_F47F2.1a
187 T G H N K G V D W W A L G I L I Y E M M V G K P P F R G K T T S E I Y D A I I E CAEEL\_F47F2.1c
202 K G H G R A V D W W A L G I L I F E M H S G F P P F F D D N P F G I Y Q K I L A PRKX\_CANLU
218 K G H G R A V D W W A L G V L I F E M L A G Y P P F F D D N P F G I Y Q K I L A PRKX\_DANRE
506 K G H G K A V D W W A L G I L I F E M L A G Y P P F Y D D D T F A I Y N K I L A DdPK2\_DICDI
187 K G H G R A V D W W A L G I L I F E M L S G F P P F F D D N P F G I Y Q K I L A PRKX\_EQUCA
226 K G H G R A V D W W A L G I L I F E M L S G F P P F F D D N P F G I Y Q K I L A PRKX\_GALLGA
219 K G H G R A V D W W A L G I L I F E M L S G F P P F F D D N P F G I Y Q K I L A PRKX\_MACMU
255 K G H G R A V D W W A L G I L I F E M L S G F P P F F D D N P F G I Y Q K I L A PRKX\_MONDO
188 K G H N K A V D W W A L G I L I Y E M L V G Y P P F F D D N P F G I Y E K I L S A7SM62\_NEMVE
265 K G H T T A V D W W A L G I L I Y E F L T G Y P P F Y H N N P L E I Y R H - - - Q7SHX1\_NEUCR
311 K G H G R A V D W W A L G I L I F E M L S G F P P F F D D N P F G I Y Q K I L A PRKX\_ORNAN
219 K G H G R A V D W W A L G I L I F E M L S G F P P F F D D N P L G I Y Q K I L A PRKX\_PANTR
219 K G H G R A V D W W A L G I L I F E M L S G F P P F F D D N P F G I Y Q K I L A Q5BK52\_RAT
205 K G H G R A V D W W A L G I L I F E M L A G Y P P F F D D N P F G I Y Q K I L A Q4RY94\_TETNG
208 K G H N K A V D W W A L G V L I Y E M L A G Y P P F Y D D N P F G I Y E K I L S PRKX\_TRICA
190 R G H N K A V D W W A L G I L L Y E M L V G Y P P F F D E S P F K I Y E K I L E PKAC3\_TRYCR

G K I D F P R H L D - L A A K D L I K K L L V V D R T R R L G N M K N G A D D V Majority
-----+-----+-----+-----+
570 580 590 600

259 G K I D F P R H L D - F H V K D L I K K L L V V D R T R R L G N M K N G A N D V PRKX\_HUMAN
256 C K I D F P R Q L D - F T S K D L I K K L L V V D R T R R L G N M K N G A E D I PRKX\_MOUSE
300 H K L K F P R S F N - L A A K D L V K K L L E V D R T Q R I G C M K N G T Q D V CAEEL\_F47F2.1b
403 G K I E W E R H M D P I - A K D L I K K L L V N D R T K R L G N M K N G A D D V DC2\_DROME
230 G K L Q F P K W V E - M R A K D L I K S F L T I E E T K R L G S V K R G V Q D V PKAC3\_TRYBR
259 G K L Y F P R H L D - F H V K T - - - - - - - - - - G R M M PRKY\_HUMAN
229 G K I E W S R H I E P I - A K D L V K K L L V Q D R T K R L G N M K N G A E D I Q16NW2\_AEDAE
308 G V L R F P A N M - P P A Q D I V S R L C Q T N E S E R L G H I K G G S A R V A6QTK8\_AJECN
206 G K I E W S R H V D P I - A K D L V K K L L V L D R T K R L G N M K N G A E D V Q7PZC6\_ANOGA
239 G K L R F T R S F D - L F A K D L V K K L L Q V D R T Q R L G N Q K D G A A D V KAPC\_ASCSU
319 G K I D F P R H L E - F S V K D L I R K K L L V T D R T R R L G N M K N G A E D V PRKX\_BOSTA
273 H K L K F P R S F N - L A A K D L V K K L L E V D R T Q R I G C M K N G T Q D V A8XJQ6\_CAEBR
273 H K L K F P R S F N - L A A K D L V K K L L E V D R T Q R I G C M K N G T Q D V CAEEL\_F47F2.1a
227 H K L K F P R S F N - L A A K D L V K K L L E V D R T Q R I G C M K N G T Q D V CAEEL\_F47F2.1c
242 G K I D F P R H L D - F S V K D L I R K K L L V V D R T R R L G N M K N G A D D V PRKX\_CANLU
258 G K L E F F P R H L D - L Y V K D L I K K F L V T D R E R R L G N M K N G A D D V PRKX\_DANRE
546 G R I T F P L G F D - V D A K D L I K R L L T A D R T R R L G A L K D G A L D V DdPK2\_DICDI
227 G K I D F P R H L D - F S V K D L V R K K L L V V D R T R R L G N M K N G A D D V PRKX\_EQUCA
266 G K I D F P R H L D - L Y V K D L I K K L L V V D R T R R L G N M K N G A D D V PRKX\_GALLGA
259 G K I D F P R H L D - F H V K D L I K K L L V V D R T R R L G N M K N G A N D V PRKX\_MACMU
295 G K I D F P R H L D - L Y V K D L I K K L L V V D R T R R L G N M K N G A D D V PRKX\_MONDO
228 G K V E W P K H M D N T S A K D L I K K L L V H D R T R R L G S M K N G S E D V A7SM62\_NEMVE
302 - - - - - - - - - - E E A K D I R S F C T V D R T M R L G N M S G G A A R V Q7SHX1\_NEUCR
351 G K I D F P R H L D - L Y V K D L I K K L L V V D R T R R L G N M K N G A D D V PRKX\_ORNAN
259 G K L D F P R H L D - F R V K D L I K K L L V V D R T R R L G N M K N G A N D M PRKX\_PANTR
259 C K I D F P R Q L D - F T S K D L I K K L L V V D R T R R L G N M K N G A E D I Q5BK52\_RAT
245 G K L E F P R H L D - F Y V K D L I K K F L V I D R A R R L G N M K N G A D D V Q4RY94\_TETNG
248 G K I E W P K H L D P V - A K D L I K K L L V Q D R T K R L G N M K S G A E D V PRKX\_TRICA
230 G K L Q F P R W L E - A R A K D L I K K L L V L E E T K R L G S L N R G T Q D V PKAC3\_TRYCR

K R H R W F R G V D W D A V P Q R K L K P P I V P K L - - - S H D G D T S N F D Majority
-----+-----+-----+-----+
610 620 630 640

298 K H H R W F R S V D W E A V P Q R K L K P P I V P K I - - - A G D G D T S N F E PRKX\_HUMAN
295 K R H R W F R S V D W E S V P Q R K L K P P I V P K L - - - S G D G D I S N F E PRKX\_MOUSE
339 K D H K W F E K V N W D D T L H L R V E P P I V P T L - Y - - H P G D T G N F D CAEEL\_F47F2.1b
442 K R H R W F K H L N W D V S K K L K P P I L P D V - - - H H D G D T K N F D DC2\_DROME
269 K R H K F Y S G V N W N V L L Q R G V A A P I H V R L - - - N N D G D T R Y F D PKAC3\_TRYBR
277 PRKY\_HUMAN
268 K R H R W F K H L D W D V I R K Q L K P P I V P K F V F - - - E G D T S N F D Q16NW2\_AEDAE

347 K Q H S F F K G V N W D D I Y H R R M K G P I V P R V - - - D S P T D A G N F E A6QTK8\_AJECN  
 245 K R H R W F K H L D W N V V I R K Q L K P P I V P T Y V F S S K E D D T S N F D Q7PZC6\_ANOGA  
 278 M N H K W F T D I D W D D V Q N M K L T P P I I P T L - Y - - S N G D T G N F D KAPC\_ASCSU  
 358 K Q H R W F R V V D W G A V P E R K L K P P I I P K L - - - C S E D D T S N F E PRKX\_BOSTA  
 312 K D H K W F E K V N W D D T L H L R V E P P I V P T L - Y - - H P G D T G N F D A8XJQ6\_CAEBR  
 312 K D H K W F E K V N W D D T L H L R V E P P I V P T L - Y - - H P G D T G N F D Q20541\_CAEBL  
 266 K D H K W F E K V N W D D T L H L R V E P P I V P T L - Y - - H P G D T G N F D CAEBL\_F47F2.1c  
 281 K R H R W F R T V D W E A V P Q R K L K P P I V P K L - - - C G E G D T S N F E PRKX\_CANLU  
 297 K K H R W F K S V N W E S V P C R K L K P P I V P K V - - - S H E G D T S N F D PRKX\_DANRE  
 585 K N H R W F S D I N W E R L Y Q R R D N G P F I P K I - - - Q H Q G D S S N F E DdPK2\_DICDI  
 266 K R H R W F R T V D W E A V P Q R K L K P P I V P K V - - - C G E G D T S N F E PRKX\_EQUCA  
 305 K R H R W F R S I D W D A V P Q R R L K P P I V P K V - - - S N D G D T S N F E PRKX\_GALLGA  
 298 K R H R W F H S V D W E A V P Q R K L K P P I V P K I - - - A G D G D T S N F E PRKX\_MACMU  
 334 K K H R W F R S V D W D A V P Q R K L K P P I V P K V - - - S N D G D T S N F E PRKX\_MONDO  
 268 K N H K W F K V I D W N L V L Q R K L K P P I N P K I - - - S H P G D T R N F D A7SM62\_NEMVE  
 331 K A H P W F K G V D W E A V E Q R R H K G P I I P H L - - - S H P G D A S C F D Q7SHX1\_NEUCR  
 390 K R H R W F R S I D W E A V P Q R K L K P P I V P K V - - - S S D G D T S N F E PRKX\_ORNAN  
 298 K R H R W F R S V D W E A V P Q R K L K P P I V P T - - - A G D G D T S N F E PRKX\_PANTR  
 298 K R H R W F R G V E W E S V P Q R K L K P P I V P K L - - - S S D G D I S N F E Q5BK52\_RAT  
 284 K K H R W F K T V D W D A V P L R K L K P P I P K V - - - S H E G D T S N F D Q4RY94\_TETNG  
 287 K R H R W F K T V D W D H D V I M R K L N P P I V P K I M Y - - - D G D A S N F D PRKX\_TRICA  
 269 K R H K F Y S G V D W D I L L Q K K V T P P I P V R L - - - N K E G D T R Y F D PKAC3\_TRYCR

D Y P E E D W D K A P P V S Q K D L E L F K N F - - - - - Majority  
 -----+-----+-----+-----  
 -----+-----+-----+-----  
 -----+-----+-----+-----  
 335 T Y P E N D W D T A A P V P Q K D L E I F K N F PRKX\_HUMAN  
 332 T Y P E S E L D K T P S V S D K D L E T F K N F PRKX\_MOUSE  
 376 D Y - E E D T T G G P L C S Q R D R D L F A E W CAEBL\_F47F2.1b  
 479 D Y P E K D W K P A K A V D Q R D L Q E Y F N D F DC2\_DROME  
 306 R Y P E S P R H P L Q P L T E A Q Q E L F S G F C D G E Y T R I PKAC3\_TRYER  
 277 PRKY\_HUMAN  
 305 D Y P E T D W K S A R S L D K V E M Q L F E D F Q16NW2\_AEDAE  
 384 I Y P D P P H P S E L A P Y T K D M - - - R D A Y E H M F K T F A6QTK8\_AJECN  
 285 D Y P E T D W K S V R S L D K I E M Q L F E D F Q7PZC6\_ANOGA  
 315 S Y - D E C S D D E I A A P Q H E L E L F E D W KAPC\_ASCSU  
 395 A Y P E N D W T S A P P V S Q K E L D V F K N F PRKX\_BOSTA  
 349 D Y - E E D T T G G P L C S Q R E R D L F A E W A8XJQ6\_CAEBR  
 349 D Y - E E D T T G G P L C S Q R D R D L F A E W Q20541\_CAEBL  
 303 D Y - E E D T T G G P L C S Q R D R D L F A E W CAEBL\_F47F2.1c  
 318 A Y P E N D W N T A P P V S P K D L E V F K N F PRKX\_CANLU  
 334 S Y P D E E W K K D T P V P A K D L E I F K N F PRKX\_DANRE  
 622 M Y D E E E M V E E P P S N - - - - Y V D P P Y A H L F K D F DdPK2\_DICDI  
 303 A Y P E N D W N T A P P V S P K D L E V F K N F PRKX\_EQUCA  
 342 A Y P E D D W N K M P P V P P K D L E I F K N F PRKX\_GALLGA  
 335 T Y P E N D W D T A A P V P Q K D L E I F K N F PRKX\_MACMU  
 371 A Y P E D D W N K M P P V P P K D L E I F K N F PRKX\_MONDO  
 305 D Y P E E D W R G A P P L N A K H L E P F K D F A7SM62\_NEMVE  
 368 V Y P E Q D V H N E - - - A Y T E E M - - - F E K Y E K Y F G D F Q7SHX1\_NEUCR  
 427 A Y P E D D W N K T P P V P P K D M E I F K N F PRKX\_ORNAN  
 335 T Y P E N D W D T A A P V P Q K D L E I F K N F PRKX\_PANTR  
 335 T Y P E G E L D K T P S V S D E D L E T F K N F Q5BK52\_RAT  
 321 V Y P E D D W K K D P P V S P K D L E I F E N F Q4RY94\_TETNG  
 324 D Y P E G D W K S A R T L E D A E L K L F E D F PRKX\_TRICA  
 306 R Y P E S P R H P L P P L T A K Q Q E M F A G F C D G E Y T K A PKAC3\_TRYCR

C

M - - - - - Majority  
 -----+-----+-----+-----  
 -----+-----+-----+-----  
 -----+-----+-----+-----  
 -----+-----+-----+-----  
 1 M G N - - - - - A A A hCa\_Homo\_sapiens  
 1 M A S - - - - - N S S hCas\_Homo\_sapiens  
 1 M - - - - - G N A T hCb1\_Homo\_sapiens  
 1 M A A Y R E P P C N Q Y T G T T T A L Q K L E G F A S R L F H R H S K G T A H D hCb2\_Homo\_sapiens  
 1 M - - - - - G L - - - hCb3\_Homo\_sapiens  
 1 M - - - - - hCb4\_Homo\_sapiens  
 1 M G N - - - - - A P hCg\_Homo\_sapiens  
 1 M - - - - - L K F L K P K S S D E G S CAEELP21137-2  
 1 M A Q P K D P H F G H S S G T N S A L Q K L D T L A S R F F Y K C R K G - - - N Q7T374\_DANRE  
 1 M G - - - - - N N A T T S N K K V D A - - - - - K D C O D R O M E  
 1 M P T - - - - - - - - - - - R L D I V G N L Q F - - - S S S T D N G D KAPC\_CAEBL  
 A K K - - E - E S - - - - - V - - - - - K E F L A K A K Majority  
 -----+-----+-----+-----  
 -----+-----+-----+-----  
 -----+-----+-----+-----  
 -----+-----+-----+-----  
 7 A K K G S E Q E S - - - - - V - - - - - K E F L A K A K hCa\_Homo\_sapiens  
 7 D - - - - - - - - - - - - - - - - - - - - - K E F L A K A K hCas\_Homo\_sapiens  
 7 A K K G S E V E S - - - - - V - - - - - K E F L A K A K hCb1\_Homo\_sapiens  
 41 Q K T A L E N D S - - - - - L H F S E H T A L W D - - - R S M K E F L A K A K hCb2\_Homo\_sapiens  
 4 - - - - - - - - - - - - - - - - - - - - - K E F L A K A K hCb3\_Homo\_sapiens  
 2 - - - - - S - - - - - V - - - - - - - - - - - K E F L A K A K hCb4\_Homo\_sapiens  
 6 A K K D T E Q E - - - - - - - - - - - - - - - - E S V N E F L A K A R hCg\_Homo\_sapiens  
 15 S K D N K N S A S - - - - - - - - - - - - - - - - L K E F L D K A R CAEELP21137-2  
 38 H D K G L E N E G - - - - - P H V S E H T V L W D - - - T A M K E T L A K A K Q7T374\_DANRE  
 15 - - - - - - - - - - - - - - - - - - - - - A - E T V K E F L E Q A K K D C O D R O M E  
 22 E D Q E A D V T A C F V L P S P S S F S K L S I L D D P V E D F K E F L D K A R KAPC\_CAEBL

```

EDFLKKWENPAQNTAGLDDFERIKKTLGTGSFGRVMLVKHK Majority
-----+-----+-----+-----+
          90          100          110          120
-----+-----+-----+-----+
25 EDFLKKWESPAQNTAHLDDQFERIKKTLGTGSFGRVMLVKHK hCa_Homo_sapiens
17 EDFLKKWESPAQNTAHLDDQFERIKKTLGTGSFGRVMLVKHK hCas_Homo_sapiens
25 EDFLKKWENPTQNNAGLEDDFERKKKTLGTGSFGRVMLVKHK hCb1_Homo_sapiens
72 EDFLKKWENPTQNNAGLEDDFERKKKTLGTGSFGRVMLVKHK hCb2_Homo_sapiens
13 EDFLKKWENPTQNNAGLEDDFERKKKTLGTGSFGRVMLVKHK hCb3_Homo_sapiens
12 EDFLKKWENPTQNNAGLEDDFERKKKTLGTGSFGRVMLVKHK hCb4_Homo_sapiens
25 GDFLLYRWGNPAQNTASSDQFERLRTLGMGSFGRVMLVRHQ hCg_Homo_sapiens
33 EDFKQRWENPAQNTACLD DFDRIKTLGTGSFGRVMLVKHK CAEELP21137-2
69 EDFLNKWECCQKSTACLD DFDKLTGTGSFGRVMLVKHK Q7T374_DANRE
27 EEFEDYKRRRNPNTNTAALDDFERIKKTLGTGSFGRVMIQHK KDCO_DROME
62 EDFKQRWENPAQNTACLD DFDRIKTLGTGSFGRVMLVKHK KAPC_CAEEL

ATGQYYAMKILDKQKVVKLLKQIEHTLNEKRILQAVNFPFL Majority
-----+-----+-----+-----+
          130          140          150          160
-----+-----+-----+-----+
65 ETGNHYAMKILDKQKVVKLLKQIEHTLNEKRILQAVNFPFL hCa_Homo_sapiens
57 ETGNHYAMKILDKQKVVKLLKQIEHTLNEKRILQAVNFPFL hCas_Homo_sapiens
65 ATEQYYAMKILDKQKVVKLLKQIEHTLNEKRILQAVNFPFL hCb1_Homo_sapiens
112 ATEQYYAMKILDKQKVVKLLKQIEHTLNEKRILQAVNFPFL hCb2_Homo_sapiens
53 ATEQYYAMKILDKQKVVKLLKQIEHTLNEKRILQAVNFPFL hCb3_Homo_sapiens
52 ATEQYYAMKILDKQKVVKLLKQIEHTLNEKRILQAVNFPFL hCb4_Homo_sapiens
65 ETGGHYAMKILNKKQKVVKMKQVEHILNEKRILQAIDFPFL hCg_Homo_sapiens
73 QSGNYAMKILDKQKVVKLLKQVEHTLNEKRILQAIDFPFL CAEELP21137-2
109 QSEQYFAMKILDKKQKVVKLLKQIEHTLNEKRILQAVSFPFL Q7T374_DANRE
67 PTKDYAMKILDKQKVVKLLKQVEHTLNEKRILQAIDFPFL KDCO_DROME
102 QSGNYAMKILDKQKVVKLLKQVEHTLNEKRILQAIDFPFL KAPC_CAEEL

VRLEFAFKDNSNLYMVMEYVPGGEMFSHLRRIGRFS EPHA Majority
-----+-----+-----+-----+
          170          180          190          200
-----+-----+-----+-----+
105 VKLEFSFKDNSNLYMVMEYVPGGEMFSHLRRIGRFS EPHA hCa_Homo_sapiens
97 VKLEFSFKDNSNLYMVMEYVPGGEMFSHLRRIGRFS EPHA hCas_Homo_sapiens
105 VRLEYAFKDNSNLYMVMEYVPGGEMFSHLRRIGRFS EPHA hCb1_Homo_sapiens
152 VRLEYAFKDNSNLYMVMEYVPGGEMFSHLRRIGRFS EPHA hCb2_Homo_sapiens
93 VRLEYAFKDNSNLYMVMEYVPGGEMFSHLRRIGRFS EPHA hCb3_Homo_sapiens
92 VRLEYAFKDNSNLYMVMEYVPGGEMFSHLRRIGRFS EPHA hCb4_Homo_sapiens
105 VKLQFSFKDNSYLYLVMEYVPGGEMFSRLQRVGRFS EPHA hCg_Homo_sapiens
113 VNMTFSFKDNSNLYMVLEFISGGEMFSHLRRIGRFS EPHS CAEELP21137-2
149 VKLECAFKDNSNLYMVVRYIQGEMFSHLRRIGRFS EQNA Q7T374_DANRE
107 VSLRYHFKDNSNLYMVLEFISGGEMFSHLRKVGRFS EPHS KDCO_DROME
142 VNMTFSFKDNSNLYMVLEFISGGEMFSHLRRIGRFS EPHS KAPC_CAEEL

RFYAAQIVLTFEYLHSLDLIYRDLKPENLLIDHQGYIQVT Majority
-----+-----+-----+-----+
          210          220          230          240
-----+-----+-----+-----+
145 RFYAAQIVLTFEYLHSLDLIYRDLKPENLLIDHQGYIQVT hCa_Homo_sapiens
137 RFYAAQIVLTFEYLHSLDLIYRDLKPENLLIDHQGYIQVT hCas_Homo_sapiens
145 RFYAAQIVLTFEYLHSLDLIYRDLKPENLLIDHQGYIQVT hCb1_Homo_sapiens
192 RFYAAQIVLTFEYLHSLDLIYRDLKPENLLIDHQGYIQVT hCb2_Homo_sapiens
133 RFYAAQIVLTFEYLHSLDLIYRDLKPENLLIDHQGYIQVT hCb3_Homo_sapiens
132 RFYAAQIVLTFEYLHSLDLIYRDLKPENLLIDHQGYIQVT hCb4_Homo_sapiens
145 CFYAAQIVLAVQYLYHSLDLIHRDLKPENLLIDHQGYLQVT hCg_Homo_sapiens
153 RFYAAQIVLAFEYLHSLDLIYRDLKPENLLIDSTGYLKIT CAEELP21137-2
189 RFYAAQIVLTFEYLHMLDLIYRDLKPENLLIDHQGYIQVT Q7T374_DANRE
147 RFYAAQIVLAFEYLHSLDLIYRDLKPENLLIDSTGYLKVIT KDCO_DROME
182 RFYAAQIVLAFEYLHSLDLIYRDLKPENLLIDSTGYLKIT KAPC_CAEEL

DFGF AKRVKGR TWTLCGTPEYLAPEIILSKGYNKAVDWWA Majority
-----+-----+-----+-----+
          250          260          270          280
-----+-----+-----+-----+
185 DFGFAKRVKGR TWTLCGTPEYLAPEIILSKGYNKAVDWWA hCa_Homo_sapiens
177 DFGFAKRVKGR TWTLCGTPEYLAPEIILSKGYNKAVDWWA hCas_Homo_sapiens
185 DFGFAKRVKGR TWTLCGTPEYLAPEIILSKGYNKAVDWWA hCb1_Homo_sapiens
232 DFGFAKRVKGR TWTLCGTPEYLAPEIILSKGYNKAVDWWA hCb2_Homo_sapiens
173 DFGFAKRVKGR TWTLCGTPEYLAPEIILSKGYNKAVDWWA hCb3_Homo_sapiens
172 DFGFAKRVKGR TWTLCGTPEYLAPEIILSKGYNKAVDWWA hCb4_Homo_sapiens
185 DFGFAKRVKGR TWTLCGTPEYLAPEIILSKGYNKAVDWWA hCg_Homo_sapiens
193 DFGFAKRVKGR TWTLCGTPEYLAPEIILSKGYNKAVDWWA CAEELP21137-2
229 DFGFAKRVKGR TWTLCGTPEYLAPEIILSKGYNKAVDWWA Q7T374_DANRE
187 DFGFAKRVKGR TWTLCGTPEYLAPEIILSKGYNKAVDWWA KDCO_DROME
222 DFGFAKRVKGR TWTLCGTPEYLAPEIILSKGYNKAVDWWA KAPC_CAEEL

```



```

L G V L I Y E M A A G Y P P F F A D Q P I Q I Y E K I V S G K V R F P S H F S S Majority
-----+-----+-----+-----+
                290                300                310                320
-----+-----+-----+-----+
225 L G V L I Y E M A A G Y P P F F A D Q P I Q I Y E K I V S G K V R F P S H F S S hCa_Homo_sapiens
217 L G V L I Y E M A A G Y P P F F A D Q P I Q I Y E K I V S G K V R F P S H F S S hCas_Homo_sapiens
225 L G V L I Y E M A A G Y P P F F A D Q P I Q I Y E K I V S G K V R F P S H F S S hCb1_Homo_sapiens
272 L G V L I Y E M A A G Y P P F F A D Q P I Q I Y E K I V S G K V R F P S H F S S hCb2_Homo_sapiens
213 L G V L I Y E M A A G Y P P F F A D Q P I Q I Y E K I V S G K V R F P S H F S S hCb3_Homo_sapiens
212 L G V L I Y E M A A G Y P P F F A D Q P I Q I Y E K I V S G K V R F P S H F S S hCb4_Homo_sapiens
225 L G V L I Y E M A V G F P P F Y A D Q P I Q I Y E K I V S G R V R F P S K L S S hCg_Homo_sapiens
233 L G V L I Y E M A A G Y P P F F A D Q P I Q I Y E K I V S G K V K F P S H F S N CAEELP21137-2
269 L G V L I Y E M A A G Y P P F F A D Q P I Q I Y E K I V S G K V R Y P S H F S S Q7T374_DANRE
227 L G V L V Y E M A A G Y P P F F A D Q P I Q I Y E K I V S G K V R F P S H F G S KDCC_DROME
262 L G V L I Y E M A A G Y P P F F A D Q P I Q I Y E K I V S G K V K F P S H F S N KAPC_CAEEL

D L K D L L R N L L Q V D L T K R F G N L K N G V S D I K N H K W F A T T D W I Majority
-----+-----+-----+-----+
                330                340                350                360
-----+-----+-----+-----+
265 D L K D L L R N L L Q V D L T K R F G N L K N G V N D I K N H K W F A T T D W I hCa_Homo_sapiens
257 D L K D L L R N L L Q V D L T K R F G N L K N G V N D I K N H K W F A T T D W I hCas_Homo_sapiens
265 D L K D L L R N L L Q V D L T K R F G N L K N G V S D I K T H K W F A T T D W I hCb1_Homo_sapiens
312 D L K D L L R N L L Q V D L T K R F G N L K N G V S D I K T H K W F A T T D W I hCb2_Homo_sapiens
253 D L K D L L R N L L Q V D L T K R F G N L K N G V S D I K T H K W F A T T D W I hCb3_Homo_sapiens
252 D L K D L L R N L L Q V D L T K R F G N L K N G V S D I K T H K W F A T T D W I hCb4_Homo_sapiens
265 D L K H L L R S L L Q V D L T K R F G N L R N G V G D I K N H K W F A T T S W I hCg_Homo_sapiens
273 E L K D L L R N L L Q V D L T K R Y G N L K N G V A D I K N H K W F G S T D W I CAEELP21137-2
309 D L K D L L R N L L Q V D L T K R F G N L K N G V S D I K N H R W F A S T D W I Q7T374_DANRE
267 D L K D L L R N L L Q V D L T K R Y G N L K A G V N D I K N Q K W F A S T D W I KDCC_DROME
302 E L K D L L R N L L Q V D L T K R Y G N L K N G V A D I K N H K W F G S T D W I KAPC_CAEEL

A I Y Q R K V E A P - - - - - F I P K F R G P G D T S N F D D Majority
-----+-----+-----+-----+
                370                380                390                400
-----+-----+-----+-----+
305 A I Y Q R K V E A P - - - - - F I P K F K G P G D T S N F D D hCa_Homo_sapiens
297 A I Y Q R K V E A P - - - - - F I P K F K G P G D T S N F D D hCas_Homo_sapiens
305 A I Y Q R K V E A P - - - - - F I P K F R G S G D T S N F D D hCb1_Homo_sapiens
352 A I Y Q R K V E A P - - - - - F I P K F R G S G D T S N F D D hCb2_Homo_sapiens
293 A I Y Q R K V E A P - - - - - F I P K F R G S G D T S N F D D hCb3_Homo_sapiens
292 A I Y Q R K V E A P - - - - - F I P K F R G S G D T S N F D D hCb4_Homo_sapiens
305 A I Y E K K V E A P - - - - - F I P K Y T G P G D A S N F D D hCg_Homo_sapiens
313 A I Y Q K K I T P P S F S K G E S N G R L F E A L Y P R V D G P A D T R H F V E CAEELP21137-2
349 A I Y E K K V D A P - - - - - I I P K C R G P G D T S N F D E Q7T374_DANRE
307 A I F Q K K I E A P - - - - - F I P R C K G P G D T S N F D D KDCC_DROME
342 A I Y Q K K I T P P S F S K G E S N G R L F E A L Y P R V D G P A D T R H F V E KAPC_CAEEL

Y E E E - - E I R V S I T E K C A K E F G E F Majority
-----+-----+-----+-----+
                410                420
-----+-----+-----+-----+
331 Y E E E - - E I R V S I N E K C G K E F S E F hCa_Homo_sapiens
323 Y E E E - - E I R V S I N E K C G K E F S E F hCas_Homo_sapiens
331 Y E E E - - D I R V S I T E K C A K E F G E F hCb1_Homo_sapiens
378 Y E E E - - D I R V S I T E K C A K E F G E F hCb2_Homo_sapiens
319 Y E E E - - D I R V S I T E K C A K E F G E F hCb3_Homo_sapiens
318 Y E E E - - D I R V S I T E K C A K E F G E F hCb4_Homo_sapiens
331 Y E E E - - E L R I S I N E K C A K E F S E F hCg_Homo_sapiens
353 E V Q E P T E F V I A A T P Q L E E L F V E F CAEELP21137-2
375 Y D E E - - V I R V S V S E Q C S K E F L D F Q7T374_DANRE
333 Y E E E - - A L R I S S T E K C A K E F A E F KDCC_DROME
382 E V Q E P T E F V I A A T P Q L E E L F V E F KAPC_CAEEL

```

**Supplemental Fig. S1:** Phylogenetic analysis of PKA, PrKX, PKC, ROCK1, AKT1, PDK1, and Aurora kinases. The sequences used in this study were identified by NCBI, Prosite, UniProt, and SwissProt database searches, aligned using Bioedit 7.0.5.3 (1), followed by ClustalW analysis (2). A table containing the accession numbers is provided below (Supplemental Tab. T1). (A) Depicted is an unrooted neighbor joining tree created with PAUP 4.0b10 (3). cAMP-dependent protein kinases: conventional PKA C subunits (dashed line), PrKX subfamily (shaded light grey) and putative members of the extended PrKX-like family (shaded dark grey) are highlighted. Written in bold are PrKX-like kinases experimentally addressed in this study. The bar represents 10 amino acid changes. (B) Alignment of PrKX subfamily of kinases and (C), alignment of conventional PKA C subunits performed with Megalign 7.0 (DNASar, Inc.). Marked in grey are the aminoacids corresponding to Arg283<sup>PrKX</sup> and Leu277<sup>Cα</sup> located in the αH-αI loop of the kinases.

**Supplemental Tab. T1:** Listed are names and sequence identifiers used for the alignment and phylogenetic analysis of kinases.

| <b>Species</b>                  | <b>Name</b>        | <b>UniProtKB/Swiss-Prot or NCBI accession number</b> |
|---------------------------------|--------------------|------------------------------------------------------|
| <i>Homo sapiens</i>             | PRKX_HUMAN         | P51817                                               |
| <i>Mus musculus</i>             | PRKX_MOUSE (Pkare) | Q922R0                                               |
| <i>Homo sapiens</i>             | PRKY_HUMAN         | O43930                                               |
| <i>Rattus norvegicus</i>        | Q5BK52_RAT         | Q5BK52                                               |
| <i>Pan troglodytes verus</i>    | PRKX_PANTR         | XP_001141503                                         |
| <i>Bos taurus</i>               | PRKX_BOSTA         | XP_582115                                            |
| <i>Macaca mulatta</i>           | PRKX_MACMU         | XP_001086667                                         |
| <i>Canis lupus familiaris</i>   | PRKX_CANLU         | XP_852513                                            |
| <i>Equus caballus</i>           | PRKX_EQUCA         | XP_001495714                                         |
| <i>Ornithorhynchus anatinus</i> | PRKX_ORNAN         | XP_001514495                                         |
| <i>Monodelphis domestica</i>    | PRKX_MONDO         | XP_001362336                                         |
| <i>Ajellomyces capsulata</i>    | A6QTK8_AJECN       | A6QTK8                                               |
| <i>Neurospora crassa</i>        | Q7SHX1_NEUCR       | Q7SHX1                                               |
| <i>Dictyostelium discoideum</i> | DdPK2_DICDI        | XP_638835                                            |
| <i>Ustilago maydis 521</i>      | PRKX_USTMA         | XP_757271                                            |
| <i>Tetraodon nigroviridis</i>   | Q4RY94_TETNG       | Q4RY94                                               |
| <i>Danio rerio</i>              | PRKX_DANRE         | XP_690430                                            |
| <i>Nematostella vectensis</i>   | A7SM62_NEMVE       | A7SM62                                               |
| <i>Drosophila melanogaster</i>  | DC2_DROME          | P16912                                               |
| <i>Drosophila melanogaster</i>  | ΔDC2_DROME         |                                                      |
| <i>Anopheles gambiae</i>        | Q7PZC6_ANOGA       | Q7PZC6                                               |
| <i>Aedes aegypti</i>            | Q16NW2_AEDAE       | Q16NW2                                               |
| <i>Tribolium castaneum</i>      | PRKX_TRICA         | XP_973065                                            |
| <i>Ascaris suum</i>             | KAPC_ASCSU         | P49673                                               |
| <i>Caenorhabditis elegans</i>   | CAEEL_F47F2.1a     | Q20541                                               |
|                                 | CAEEL_F47F2.1b     | NP_508671                                            |
|                                 | CAEEL_F47F2.1c     | NP_741759                                            |
| <i>Caenorhabditis briggsae</i>  | A8XJQ6_CAEBR       | XP_001676476                                         |
| <i>Gallus gallus</i>            | PRKX_GALLGA        | XP_416852                                            |
| <i>Trypanosoma brucei</i>       | PKAC3_TRYBR        | Q8WSK3                                               |
| <i>Trypanosoma cruzi</i>        | PKAC3_TRYCR        | XP_809454                                            |
| <i>Homo sapiens</i>             | hCa                | P17612                                               |
|                                 | hCas               | P17612-2                                             |
|                                 | hCβ1               | P22694-1                                             |
|                                 | hCβ2               | P22694-2                                             |
|                                 | hCβ3               | P22694-3                                             |
|                                 | hCβ4               | P22694-4                                             |
|                                 | hCγ                | P22612                                               |

|                                  |                   |            |
|----------------------------------|-------------------|------------|
| <i>Drosophila melanogaster</i>   | DC0               | P12370     |
|                                  | DC1               | P16911-2   |
| <i>Caenorhabditis elegans</i>    | Kin-1             | P21137     |
|                                  | Kin-1a            | P21137-2   |
| <i>Danio rerio</i>               | Q7T374_DANRE      | Q7T374     |
| <i>Homo sapiens</i>              | PKC- $\alpha$     | P17252     |
|                                  | PKC- $\beta$ 1    | P05771-1   |
|                                  | PKC- $\beta$ 2    | P05771-2   |
|                                  | PKC- $\gamma$     | P05129     |
| <i>Homo sapiens</i>              | Akt1/PKB          | P31749     |
| <i>Homo sapiens</i>              | PDK1              | O15530     |
| <i>Homo sapiens</i>              | Aurora-A          | O14965     |
| <i>Homo sapiens</i>              | ROCK1             | Q13464     |
| <i>Saccharomyces cerevisiae</i>  | KAPA_YEAST (TPK1) | P06244     |
| <i>Trypanosoma brucei brucei</i> | PKAC1             | Q3S1L1 (7) |
|                                  | PKAC2             | Q3S1K7 (7) |

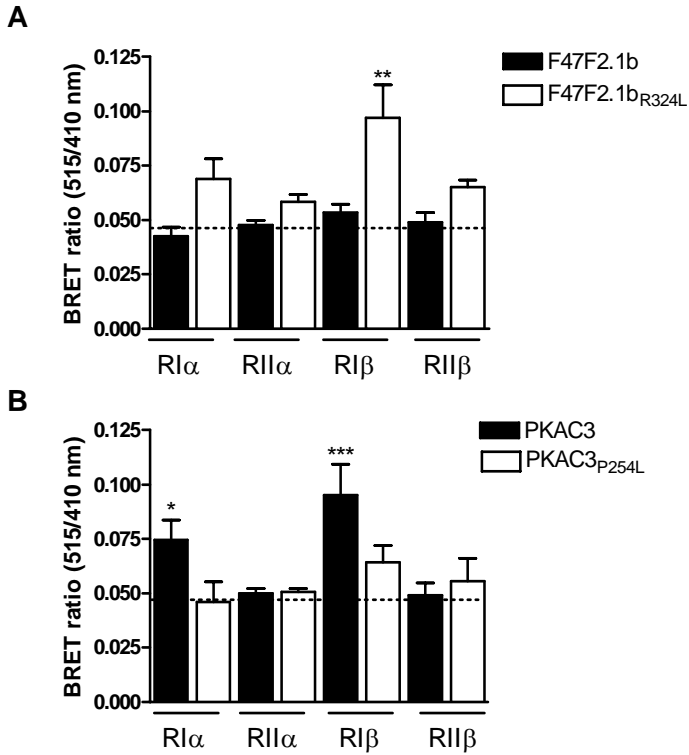

**Supplemental Fig. S2: *C. elegans* F47F2.1b and *T. brucei* PKAC3 interaction with human R subunits.** The BRET assay was performed as described in the Experimental Procedures section. (A) Holoenzyme formation of wildtype (black bars) and F47F2.1b<sub>R324L</sub> (white bars) was assayed with four human R subunits. (B) Interaction analysis of PKAC3 (black bars) and PKAC3<sub>P254L</sub> mutant protein (white bars) with R subunits. Depicted are original BRET values ( $\pm$  SEM) obtained from at least two independent experiments (n=6 wells). The dotted line represents the mean background value of the BRET assay. Significant values above the background are indicated in the plot (\*; P<0.05; \*\*, P<0.01, \*\*\* P<0.001).

**Supplemental Tab. T2:** Eukaryotic and prokaryotic protein expression vectors. *Renilla* luciferase (Rluc) as well as green fluorescent protein (GFP<sup>2</sup>) fusion protein expression vectors for the BRET assay (Rluc(h)-N1-3, GFP<sup>2</sup>-C1-3) were obtained from PerkinElmer Life and Analytical Sciences (Wellesley, U.S.A.). Oligonucleotides (MWG Biotech AG, Ebersberg, Germany) and vectors used for expression vector cloning and for mutagenesis are listed below.

| construct                        | vector       | (fusion) protein        | restriction sites | primer_forward                                           | primer_reverse                                                  |
|----------------------------------|--------------|-------------------------|-------------------|----------------------------------------------------------|-----------------------------------------------------------------|
| GFP-C3-PrKX                      | GFP2-C3      | GFP-PrKX                | HindIII/BamHI     | GAT AAG CTT ATG<br>GAG GCG CCC                           | GGT GGA TCC TCA<br>GAA ATT CTT GAA                              |
| GFP-C3-PrKY                      | GFP2-C3      | GFP-PrKY                | HindIII/BamHI     | ATA AAG CTT ATG<br>GAG GCG CCC GG                        | TAT GGA TCC TCA<br>CAT CAT TCG CCC CG                           |
| GFP-C3-Pkare                     | GFP2-C3      | GFP-Pkare               | HindIII/BamHI     | CTC AAG CTT ATG<br>GAG CCG CCC                           | CGC GGA GCC TCA<br>GAA ATT TTT G                                |
| GFP-C2-DC2                       | GFP2-C2      | GFP-DC2                 | EcoRI/HindIII     | ATA GAA TTC ATG<br>GAT TTG TGG CAT<br>ATA TTT TTG GAA CG | ATT AAG CTT TTA<br>GAA ATC ATT GAA<br>GTA CTG CAA ATC TC        |
| GFP-C2-A1-227 DC2                | GFP2-C2      | GFP-ADC2                | EcoRI/HindIII     | ATA GAA TTCATG GAT<br>GCG GAT GAC GCC<br>ACT C           | ATT AAG CTT TTA<br>GAA ATC ATT GAA<br>GTA CTG CAA ATC TC        |
| GFP-C3-PKAC3                     | GFP2-C3      | GFP-PKAC3               | HindIII/BamHI     | ATC GAA GCTT ATG<br>ACG ACA ACT CCC<br>ACT GG            | ACG CGG ATC CGA<br>TCC TCG TGT ATT CAC<br>CAT CG                |
| GFP-C1-F47F2.1b                  | GFP2-C1      | GFP-F47F2.1b            | KpnI/BamHI        | TAT GGT ACC ATG TCT<br>TCG TCG ACA TCA<br>TCA GTG G      | ATA GGA TCC TCA<br>CCA TTC GGC GAA<br>AAG ATC GC                |
| pRSET <sub>B</sub> -hC $\alpha$  | pRSETb       | hC $\alpha$             | NdeI/KpnI         | CAT ATG GGC AAC<br>GCC GCC GCC G                         | GGT ACC CTA AAA<br>CTC AGA AAA CTC<br>CTT GCC AC                |
| pHis5BA-hC $\alpha$              | pHis5BA      | His6-hC $\alpha$        | NruI/HindIII      | -                                                        | -                                                               |
| pRSET <sub>B</sub> -hRII $\beta$ | pRSETb       | hRII $\beta$            | NdeI/EcoRI        | CAT ATG AGC ATC<br>GAG ATC CCG                           | GGA TTC TCA TGC<br>AGT GGG TTC AAC<br>AAT ATC C                 |
| Rluc-N1-hRII $\beta$             | Rluc(h)-N1   | hRII $\beta$ -Rluc      | XhoI/HindIII      | ATA CTC GAG ATG<br>GCC TCC CCG CCC<br>GCC TGC            | TAT AAG CTT CCG<br>ACG GTG AGG GAG<br>ATG AAG CTG TTG<br>TAA CG |
| Rluc-N2-hRII $\beta$             | Rluc(h)-N2   | hRII $\beta$ -Rluc      | BglII/KpnI        | AGA TCT ATG AGC<br>ATC GAG ATC CCG<br>GCG                | GGT ACC TGC AGT<br>GGG TTC AAC AAT<br>ATC CAT G                 |
|                                  |              |                         |                   | <b>mutagenesis primer_forward</b>                        | <b>mutagenesis primer_reverse</b>                               |
| GFP-C3-hC $\alpha$ K283A         | GFP2-C3      | GFP-hC $\alpha$ K283A   | -                 | GGG AAC CTC GCC<br>AAT GGG GTC                           | GAC CCC ATT GGC<br>GAG GTT CCC                                  |
| GFP-C3-hC $\alpha$ L277R         | GFP2-C3      | GFP-hC $\alpha$ L277R   | -                 | G CAG GTA GAT CGC<br>ACC AAG CGC                         | GCGCTTGGTGCATCT<br>ACCTGC                                       |
| pHis5BA-hC $\alpha$              | pHis5BA      | His6-hC $\alpha$ L277R  | -                 | G CAG GTA GAT CGC<br>ACC AAG CGC                         | GCGCTTGGTGCATCT<br>ACCTGC                                       |
| GFP-C3-PrKXR283L                 | GFP2-C3      | GFP-PrKXR283L           | -                 | G CTC GTG GTT GAC<br>CTA ACA AGG CG                      | CGCCTTGTTAGGTCAA<br>CCACGAGC                                    |
| pFastbac HTb-PRKXR283L           | pFastbac HTb | His6-PrKXR283L          | -                 | G CTC GTG GTT GAC<br>CTA ACA AGG CG                      | CGCCTTGTTAGGTCAA<br>CCACGAGC                                    |
| GFP-C3-PKAC3P254L                | GFP2-C3      | GFP-PKAC3P254L          | -                 | CTA ACA ATT GAA<br>CTA ACG AAA CGC C                     | GGC GTT TCG TTA GTT<br>CAA TTG TTA G                            |
| GFP-C1-F47F2.1bR324L             | GFP2-C1      | GFP-F47F2.1bR324L       | -                 | G GAA GTA GAT CTA<br>ACT CAA CGC                         | GCG TTG AGT TAG<br>ATC TAC TTC C                                |
| Rluc-N2-hRII $\beta$ S114A       | Rluc(h)-N2   | hRII $\beta$ S114A-Rluc | -                 | CGG CGA GGA AGC<br>GTG AGT GCC                           | GGC ACT CAC GCT<br>TCC TCG CCG                                  |
| Rluc-N1-hRII $\beta$ G99S        | Rluc(h)-N1   | hRII $\beta$ G99S-Rluc  | -                 | GGC GTG CCG CAG<br>TAT GTG CAG                           | CTG CAC ATA CTG<br>CGG CAC GCC                                  |

## REFERENCES

1. Hall, T. A. (1999) BioEdit: a user-friendly biological sequence alignment editor and analysis program for windows 95/98/NT. In. *Nucl.Acids.Symp.Ser.*
2. Thompson, J. D., Higgins, D. G., and Gibson, T. J. (1994) *Nucleic Acids Res* **22**(22), 4673-4680
3. Swofford, D. L. (2001) *PAUP\**. *Phylogenetic Analysis Using Parsimony (\*and Other Methods)*, Sinauer Associates, Sunderland, Massachusetts
